# Supplementary material for: The first water-soluble polynuclear metallamacrocyclic Sr(ii)–Cu(ii) complex based on simple glycinehydroximate ligands
Source: Royal Society of Chemistry journal article supplement (doi:10.1039/c9dt01368g), 2019-01-01
Supplement: c9dt01368g1.pdf [file c9dt01368g1.pdf]

### Supporting Information:

## The first water-soluble polynuclear metallamacrocyclic Sr(II)-Cu(II) complex based on simple glycinehydroximate ligands

Marina A. Katkova,<sup>a</sup> Galina S. Zabrodina,<sup>a</sup> Grigory Yu. Zhigulin,<sup>a</sup> Evgeny V. Baranov,<sup>a</sup> Maria M. Trigub,<sup>b</sup> Alexey A. Terentiev<sup>b</sup> and Sergey Yu. Ketkov<sup>\*a</sup>

<sup>a</sup>G.A. Razuvaev Institute of Organometallic Chemistry RAS, 49 Tropinina St., 603950 Nizhny Novgorod, Russian Federation.

<sup>b</sup>Institute of Problems of Chemical Physics RAS, 142432 Chernogolovka, Russian Federation.

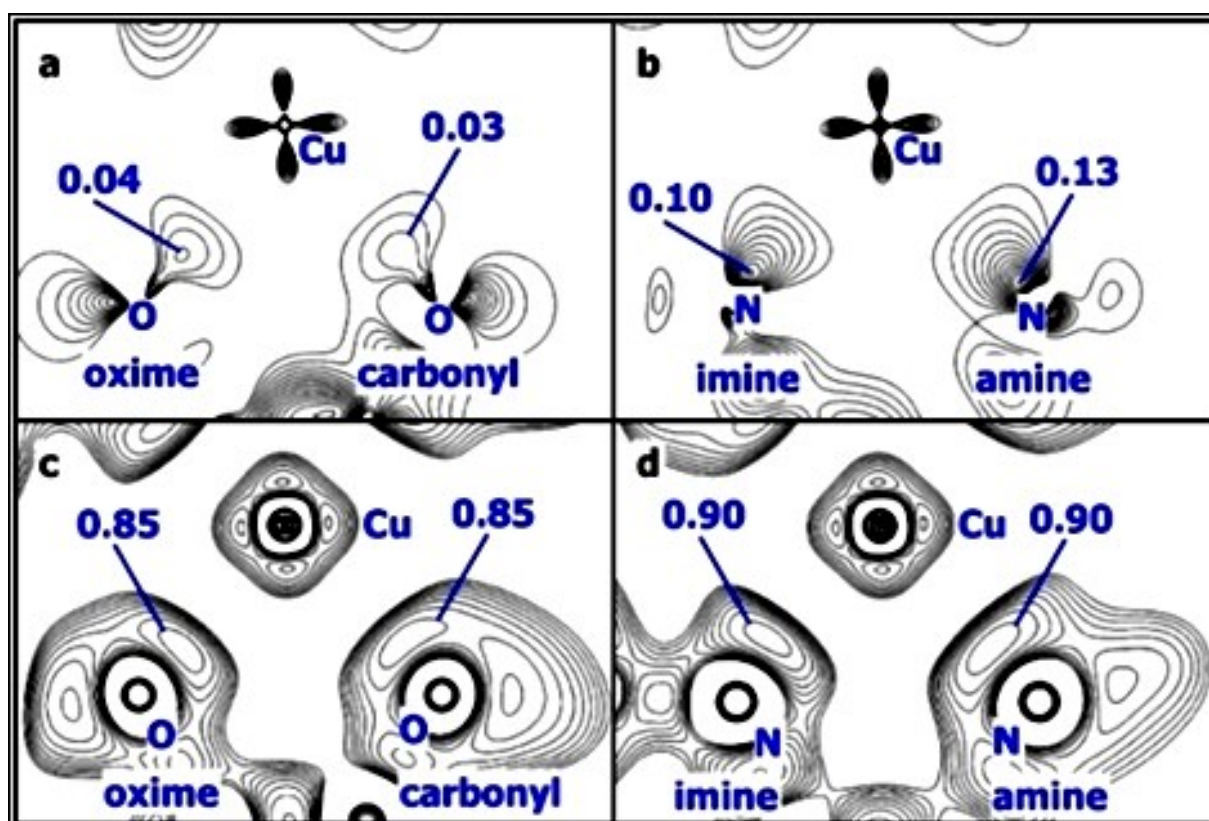

**Fig. 1S.** Positive Deformation Electron Density maps of the {Sr(H<sub>2</sub>O)<sub>3</sub>[15-MCu(II)Glyha-5](H<sub>2</sub>O)<sub>5</sub>}<sup>2+</sup> complex in the planes of the atoms O(oxime), Cu, O(carbonyl) (a) and N(imine), Cu, N(amine) (b). Figures c and d give the ELF distributions in the same planes. DED contour lines start from 0.01 a.u. with step of 0.01 a.u. ELF contour lines start from 0.5 with step of 0.05. The maps a-d are built at the same scale (the M06/DGDZVP level with PCM).

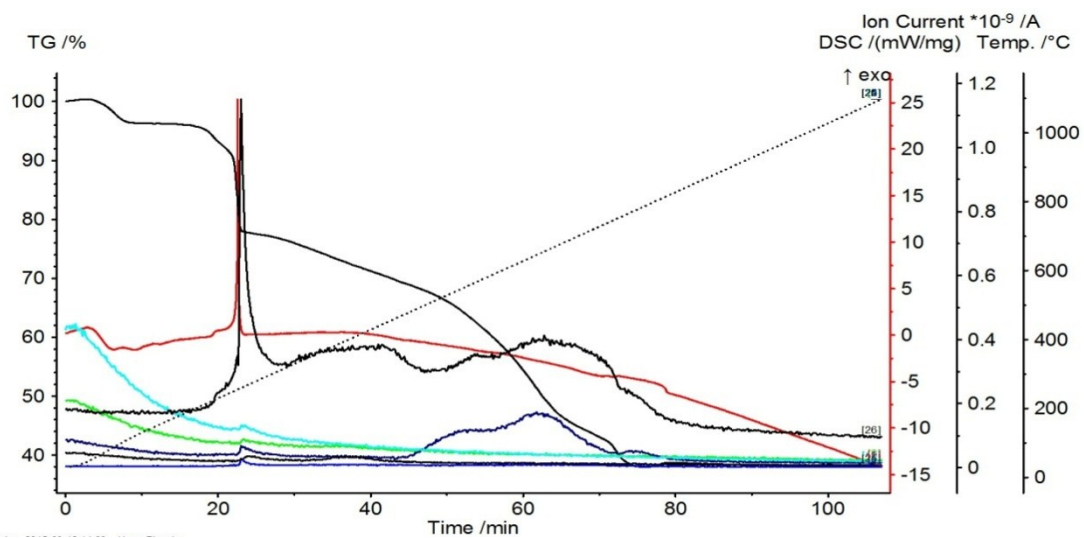

The data of TG-DSC-MS analysis for sample  $\text{Sr}(\text{H}_2\text{O})_3[15\text{MCuGlyha-5}](\text{Cl})_2$
